# Supplementary material for: Whole Genome Analysis of the Red-Crowned Crane Provides Insight into Avian Longevity
Source: PubMed Central journal article supplement — Mol Cells. 2020 Jan 14;43(1):86–95. doi: 10.14348/molcells.2019.0190 (PMC6999708; doi:10.14348/molcells.2019.0190), 2020-01-14
Supplement: molce-43-086_supple.pdf [file molce-43-086_supple.pdf]

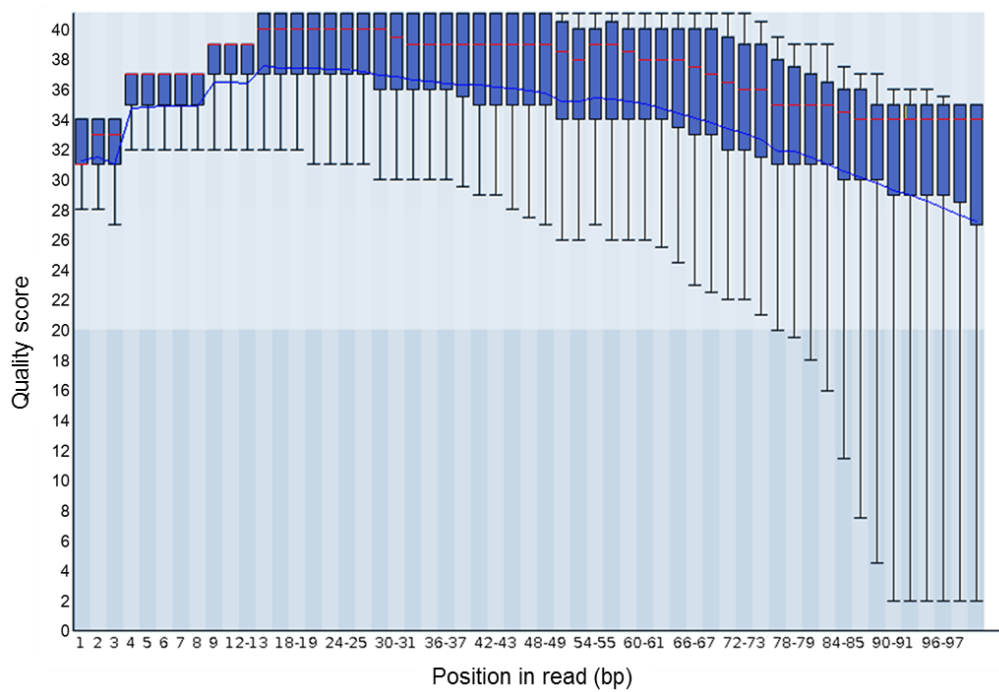

**Supplementary Fig. S1.** Quality scores obtained for all base positions by FastQC.

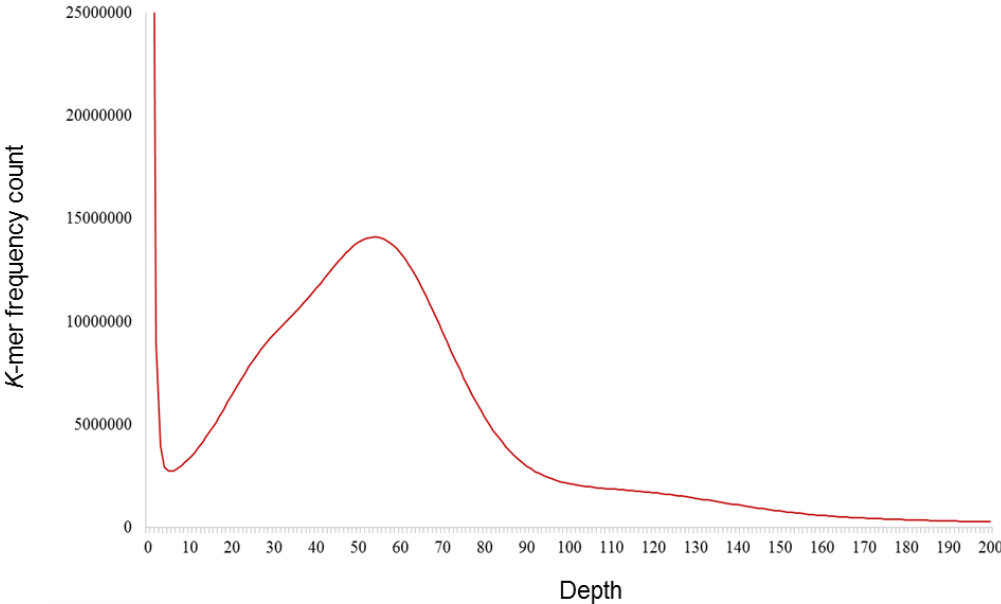

**Supplementary Fig. S2.** Estimation of genome size using 17-mers.

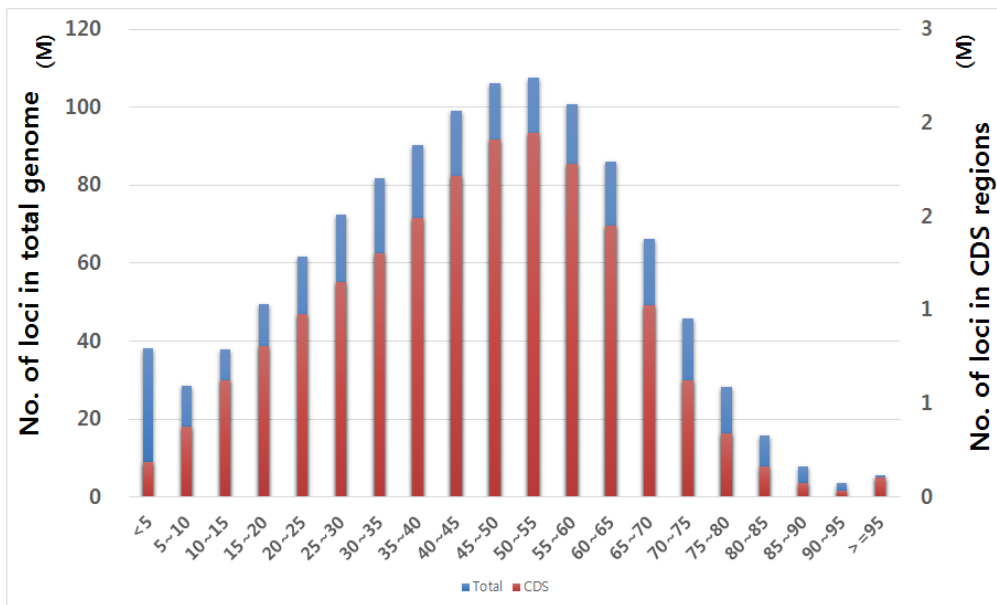

**Supplementary Fig. S3.** Distribution of read depths mapped to the gray-crowned crane reference genome (blue) and CDS (red) regions.

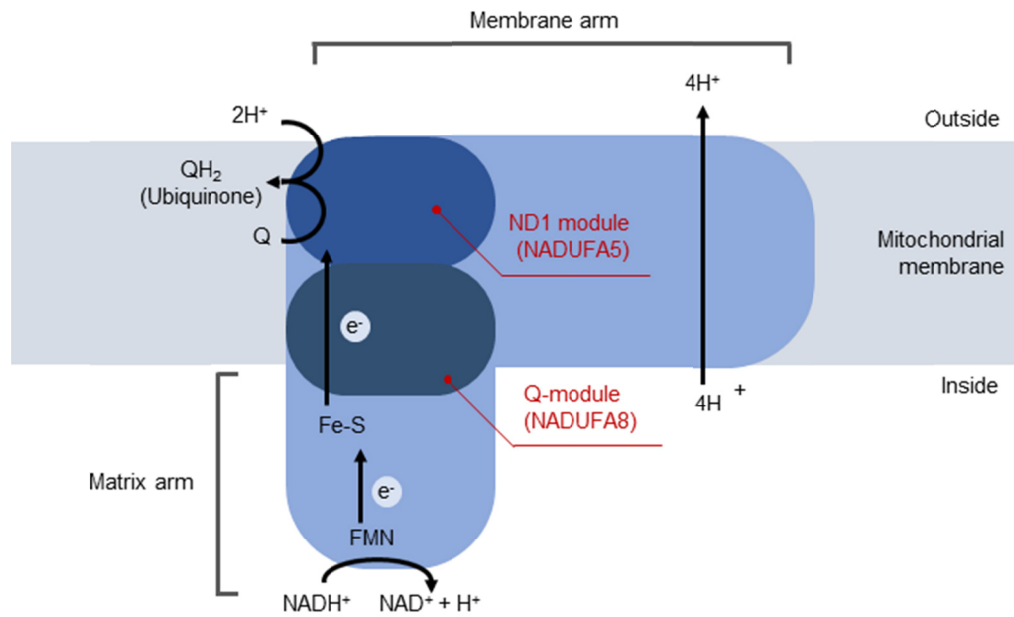

**Supplementary Fig. S4. Schematic overview of the protein structure and electron transfer in NADH-ubiquinone oxidoreductase.** The red line indicates the location of the ND1 module and Q-module. Red-crowned crane PSGs are represented with red text.

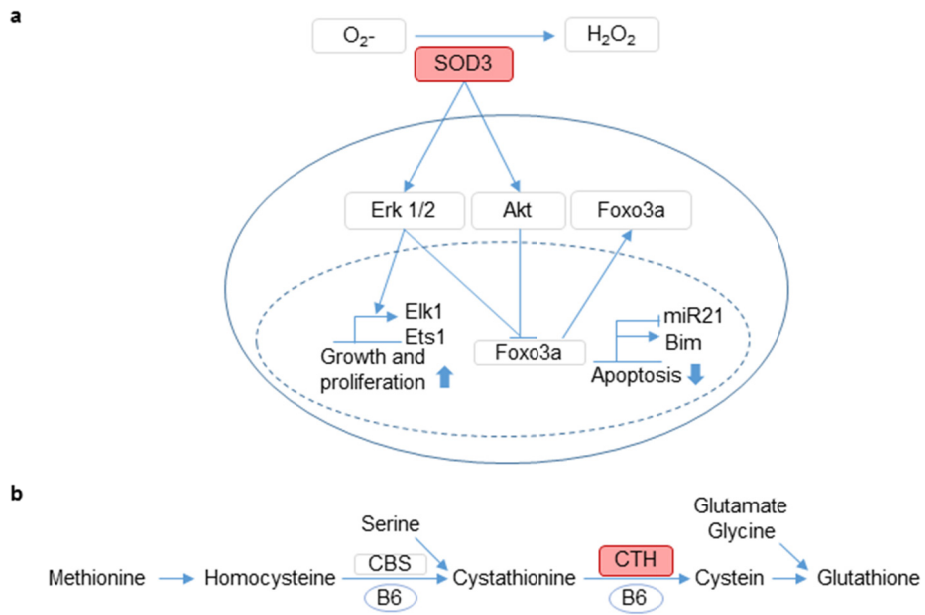

**Supplementary Fig. S5. Schematic overview of signal transduction pathways. (a)**

Depiction of cellular responses to *SOD3*. (b) Depiction of a homocysteine metabolic pathway

involving *CTH*.
